# Supplementary material for: Real-World Time on Treatment with First-Line Pembrolizumab Monotherapy for Advanced NSCLC with PD-L1 Expression ≥ 50%: 3-Year Follow-Up Data
Source: MDPI journal article supplement (doi:10.3390/cancers14041041), 2022-02-18
Supplement: s1 [file s1]

**Table S1.** Additional characteristics of patients with advanced NSCLC (stage IIIB/C, IV), according to ECOG performance status.

| Characteristic                                           | ECOG PS 0–1<br><i>N</i> = 807 | ECOG PS 2<br><i>N</i> = 237 |
|----------------------------------------------------------|-------------------------------|-----------------------------|
| US CB region, data available, <i>N</i>                   | 780                           | 227                         |
| Northeast <sup>1</sup>                                   | 145 (18.6)                    | 45 (19.8)                   |
| Midwest <sup>1</sup>                                     | 174 (22.3)                    | 43 (18.9)                   |
| South <sup>1</sup>                                       | 353 (45.3)                    | 119 (52.4)                  |
| West <sup>1</sup>                                        | 108 (13.8)                    | 20 (8.8)                    |
| Community oncology clinic                                | 789 (97.8)                    | 230 (97.0)                  |
| Academic oncology clinic                                 | 18 (2.2)                      | 7 (3.0)                     |
| Index year                                               |                               |                             |
| 2016                                                     | 18 (2.2)                      | 11 (4.6)                    |
| 2017                                                     | 275 (34.1)                    | 69 (29.1)                   |
| 2018                                                     | 241 (29.9)                    | 75 (31.6)                   |
| 2019                                                     | 209 (25.9)                    | 67 (28.3)                   |
| 2020                                                     | 64 (7.9)                      | 15 (6.3)                    |
| <i>BRAF</i> mutation status (nonsquamous only), <i>N</i> | 544                           | 170                         |
| Positive <sup>2</sup>                                    | 37 (6.8)                      | 8 (4.7)                     |
| Wild type                                                | 338 (62.1)                    | 102 (60.0)                  |
| Indeterminate, unknown, pending, untested                | 169 (31.1)                    | 60 (35.3)                   |

Data are *n* (%) unless otherwise noted. Percentages may not add up to 100% because of rounding.

<sup>1</sup> Percentages for US CB region represent the percentages of patients with available data.

<sup>2</sup> Positive biomarker results at any time (“ever positive”) were included.

US CB: United States Census Bureau.

**Table S2.** Distribution of the number of administered cycles of first-line pembrolizumab for patients with advanced NSCLC, according to ECOG performance status, among patients with at least 2 years of theoretical follow-up <sup>1</sup>

| Variable                                    | ECOG PS 0–1 | ECOG PS 2  |
|---------------------------------------------|-------------|------------|
|                                             | N = 587     | N = 174    |
| Number of cycles, mean (SD)                 | 16.0 (16.3) | 9.5 (13.4) |
| Median (range)                              | 10.0 (1–73) | 3.5 (1–68) |
| Number of cycles, <i>n</i> (%) <sup>2</sup> |             |            |
| 1                                           | 55 (9.4)    | 50 (28.7)  |
| 2                                           | 39 (6.6)    | 18 (10.3)  |
| 3                                           | 41 (7.0)    | 19 (10.9)  |
| 4                                           | 41 (7.0)    | 10 (5.7)   |
| 5                                           | 33 (5.6)    | 11 (6.3)   |
| 6–17                                        | 189 (32.2)  | 34 (19.5)  |
| 18–34                                       | 97 (16.5)   | 18 (10.3)  |
| ≥35                                         | 92 (15.7)   | 14 (8.0)   |

<sup>1</sup> Patients initiating first-line pembrolizumab on or before 31 March 2019 (data cutoff, 31 March 2021).

<sup>2</sup> 35 (6.0%) and 3 (1.7%) in PS 0–1 and PS 2 cohorts, respectively, received the pembrolizumab 400 mg dosage.

**Table S3.** Baseline characteristics of patients with initial NSCLC diagnosis made at stage IV, according to ECOG performance status.

| Characteristic                             | ECOG PS 0–1<br>N = 566 | ECOG PS 2<br>N = 178 |
|--------------------------------------------|------------------------|----------------------|
| Men                                        | 298 (52.7)             | 89 (50.0)            |
| Age, median (range), yr                    | 71 (38–84)             | 75 (48–84)           |
| <75 yr                                     | 359 (63.4)             | 88 (49.4)            |
| ≥75 yr                                     | 207 (36.6)             | 90 (50.6)            |
| Race data available, N                     | 505                    | 153                  |
| White <sup>1</sup>                         | 383 (75.8)             | 108 (70.6)           |
| Black <sup>1</sup>                         | 49 (9.7)               | 21 (13.7)            |
| Asian <sup>1</sup>                         | 17 (3.4)               | 1 (0.7)              |
| Other race <sup>1</sup>                    | 56 (11.1)              | 23 (15.0)            |
| Current/former smoker                      | 524 (92.6)             | 169 (94.9)           |
| No smoking history                         | 42 (7.4)               | 9 (5.1)              |
| CCI score, mean (SD)                       | 5.1 (3.1)              | 5.5 (3.2)            |
| Median (range)                             | 4 (0–13)               | 6 (2–11)             |
| NSCLC histology                            |                        |                      |
| Nonsquamous                                | 405 (71.6)             | 132 (74.2)           |
| Squamous                                   | 133 (23.5)             | 39 (21.9)            |
| NSCLC histology NOS                        | 28 (4.9)               | 7 (3.9)              |
| KRAS mutation status (nonsquamous only), N | 405                    | 132                  |
| Positive <sup>2</sup>                      | 107 (26.4)             | 40 (30.3)            |
| Wild type                                  | 125 (30.9)             | 34 (25.8)            |
| Indeterminate, unknown, pending, untested  | 173 (42.7)             | 58 (43.9)            |
| Record of brain metastases <sup>3</sup>    | 69 (12.2)              | 23 (12.9)            |

Data are *n* (%) unless otherwise noted. Percentages may not add up to 100 because of rounding.

<sup>1</sup> Percentages for race represent the percentages of patients with available data.

<sup>2</sup> Positive biomarker results at any time (“ever positive”) were included.

<sup>3</sup> Information about prior treatment of brain metastases was not available.

CCI: Charlson comorbidity index; ECOG: Eastern Cooperative Oncology Group; NSCLC histology NOS: non-small cell lung cancer histology not otherwise specified.

**Table S4.** Real-world time on treatment with first-line pembrolizumab monotherapy for patients with initial NSCLC diagnosis made at stage IV, according to ECOG performance status.

| Variable                                               | ECOG PS 0–1      | ECOG PS 2        |
|--------------------------------------------------------|------------------|------------------|
|                                                        | N = 566          | N = 178          |
| Theoretical follow-up, median (range), mo <sup>1</sup> | 35.1 (12.0–52.7) | 33.3 (12.2–52.3) |
| Patient follow-up, median (range), mo <sup>1</sup>     | 16.5 (<0.1–52.6) | 4.3 (<0.1–51.5)  |
| Discontinued pembrolizumab, n (%)                      | 441 (77.9)       | 157 (88.2)       |
| rwToT, median (95% CI), mo                             | 6.5 (5.6–7.6)    | 1.6 (0.7–2.8)    |
| Restricted mean rwToT (95% CI), mo                     |                  |                  |
| Restricted to 12 months                                | 6.8 (6.4–7.2)    | 3.9 (3.3–4.7)    |
| Restricted to 24 months                                | 10.0 (9.2–10.7)  | 5.2 (4.2–6.5)    |
| Restricted to 36 months                                | 12.1 (11.1–13.2) | 6.5 (5.1–8.3)    |
| Restricted to 48 months                                | 13.3 (12.1–14.8) | 7.5 (5.7–9.8)    |
|                                                        | [Weibull]        | [Lognormal]      |
| On-treatment rate, % (95% CI) <sup>2</sup>             |                  |                  |
| At 12 months                                           | 34.5 (30.5–38.5) | 19.4 (13.8–25.7) |
| At 24 months                                           | 21.2 (17.7–25.0) | 7.7 (4.0–13.0)   |
| At 36 months                                           | 14.3 (11.0–18.1) | 6.6 (3.1–11.9)   |
| At 48 months                                           | 10.4 (6.7–15.1)  | n/a              |

<sup>1</sup> Theoretical follow-up was defined as the duration of follow-up from first-line therapy initiation to database cutoff (31 March 2021). Patient follow-up was defined as time from first-line therapy initiation to the date of death or data cutoff, whichever occurred first.

<sup>2</sup> On-treatment rates were based on Kaplan-Meier estimates.

mo: months; n/a: not assessable; rwToT: real-world time on treatment.

**Table S5.** Subsequent systemic anticancer therapy regimens

| <b>Regimen by treatment line <sup>1</sup></b>           | <b>ECOG 0–1<br/>N = 807</b> | <b>ECOG 2<br/>N = 237</b> |
|---------------------------------------------------------|-----------------------------|---------------------------|
| <b>Systemic Therapy Line 2</b>                          | <b>263 (32.6)</b>           | <b>39 (16.5)</b>          |
| <i>Line 2: Anti-PD-1/PD-L1-based therapies</i>          | 105 (39.9)                  | 11 (28.2)                 |
| Carboplatin, pembrolizumab, pemetrexed                  | 27 (25.7)                   | 2 (18.2)                  |
| Pembrolizumab                                           | 25 (23.8)                   | 3 (27.3)                  |
| Carboplatin, paclitaxel, pembrolizumab                  | 12 (11.4)                   | 2 (18.2)                  |
| Nivolumab                                               | 8 (7.6)                     | 0                         |
| Pembrolizumab, pemetrexed                               | 5 (4.8)                     | 1 (9.1)                   |
| Carboplatin, paclitaxel protein-bound, pembrolizumab    | 2 (1.9)                     | 1 (9.1)                   |
| Atezolizumab                                            | 3 (2.9)                     | 0                         |
| Anastrozole, pembrolizumab                              | 2 (1.9)                     | 0                         |
| Bevacizumab-awwb, pembrolizumab                         | 1 (1.0)                     | 0                         |
| Exemestane, pembrolizumab                               | 2 (1.9)                     | 0                         |
| Imatinib, pembrolizumab                                 | 1 (1.0)                     | 0                         |
| Paclitaxel, pembrolizumab                               | 1 (1.0)                     | 1 (9.1)                   |
| Anastrozole, carboplatin, pembrolizumab, pemetrexed     | 1 (1.0)                     | 0                         |
| Atezolizumab, carboplatin, paclitaxel                   | 1 (1.0)                     | 0                         |
| Atezolizumab, carboplatin, paclitaxel protein-bound     | 1 (1.0)                     | 0                         |
| Bevacizumab, pembrolizumab                              | 1 (1.0)                     | 0                         |
| Bevacizumab, pembrolizumab, pemetrexed                  | 1 (1.0)                     | 0                         |
| Cabozantinib, crizotinib, pembrolizumab                 | 1 (1.0)                     | 0                         |
| Capecitabine, pembrolizumab                             | 1 (1.0)                     | 0                         |
| Carboplatin, docetaxel, pembrolizumab                   | 1 (1.0)                     | 0                         |
| Carboplatin, gemcitabine, pembrolizumab, pemetrexed     | 1 (1.0)                     | 0                         |
| Carboplatin, ipilimumab, nivolumab, pemetrexed          | 1 (1.0)                     | 0                         |
| Carboplatin, pembrolizumab                              | 1 (1.0)                     | 0                         |
| Hydroxyurea, pembrolizumab                              | 1 (1.0)                     | 0                         |
| Ipilimumab, nivolumab                                   | 0                           | 1 (9.1)                   |
| Ipilimumab, nivolumab, pembrolizumab                    | 1 (1.0)                     | 0                         |
| Letrozole, pembrolizumab                                | 1 (1.0)                     | 0                         |
| Medroxyprogesterone, pembrolizumab                      | 1 (1.0)                     | 0                         |
| Niraparib, pembrolizumab                                | 1 (1.0)                     | 0                         |
| <i>Line 2: Anti-VEGF-based therapies</i>                | 25 (9.5)                    | 4 (10.3)                  |
| Bevacizumab, carboplatin, pemetrexed                    | 16 (64.0)                   | 2 (50.0)                  |
| Docetaxel, ramucirumab                                  | 2 (8.0)                     | 1 (25.0)                  |
| Bevacizumab-awwb, carboplatin, pemetrexed               | 3 (12.0)                    | 1 (25.0)                  |
| Bevacizumab, cisplatin, pemetrexed                      | 1 (4.0)                     | 0                         |
| Bevacizumab, gemcitabine                                | 1 (4.0)                     | 0                         |
| Bevacizumab-bvzr, carboplatin, paclitaxel               | 1 (4.0)                     | 0                         |
| Bevacizumab-bvzr, fluorouracil, leucovorin, oxaliplatin | 1 (4.0)                     | 0                         |
| <i>Line 2: Platinum-based chemotherapy combinations</i> | 88 (33.5)                   | 17 (43.6)                 |
| Carboplatin, pemetrexed                                 | 41 (46.6)                   | 6 (35.3)                  |
| Carboplatin, paclitaxel                                 | 21 (23.9)                   | 3 (17.6)                  |
| Carboplatin, paclitaxel protein-bound                   | 14 (15.9)                   | 5 (29.4)                  |
| Carboplatin, gemcitabine                                | 9 (10.2)                    | 2 (11.8)                  |

|                                                          |                  |                 |
|----------------------------------------------------------|------------------|-----------------|
| Carboplatin, docetaxel                                   | 0                | 1 (5.9)         |
| Carboplatin, etoposide                                   | 1 (1.1)          | 0               |
| Carboplatin, etoposide, paclitaxel                       | 1 (1.1)          | 0               |
| Cisplatin, gemcitabine                                   | 1 (1.1)          | 0               |
| <b>Line 2: Non-platinum-based chemo combinations</b>     | <b>3 (1.1)</b>   | <b>0</b>        |
| Docetaxel, gemcitabine                                   | 1 (33.3)         | 0               |
| Abiraterone, pemetrexed                                  | 1 (33.3)         | 0               |
| Gemcitabine, paclitaxel                                  | 1 (33.3)         | 0               |
| <b>Line 2: Single agent chemotherapy</b>                 | <b>29 (11.0)</b> | <b>6 (15.4)</b> |
| Pemetrexed                                               | 14 (48.3)        | 2 (33.3)        |
| Docetaxel                                                | 8 (27.6)         | 3 (50.0)        |
| Gemcitabine                                              | 4 (13.8)         | 1 (16.7)        |
| Vinorelbine                                              | 2 (6.9)          | 0               |
| Paclitaxel                                               | 1 (3.4)          | 0               |
| <b>Line 2: Other therapy</b>                             | <b>13 (4.9)</b>  | <b>1 (2.6)</b>  |
| Dabrafenib, trametinib                                   | 4 (30.8)         | 0               |
| Crizotinib                                               | 1 (7.7)          | 0               |
| Capecitabine                                             | 1 (7.7)          | 0               |
| Capmatinib                                               | 2 (15.4)         | 0               |
| Ado-trastuzumab emtansine                                | 1 (7.7)          | 0               |
| Alectinib                                                | 1 (7.7)          | 0               |
| Cyclophosphamide, rituximab, vincristine                 | 1 (7.7)          | 0               |
| Leuprolide                                               | 1 (7.7)          | 0               |
| Methotrexate                                             | 1 (7.7)          | 0               |
| Olaparib                                                 | 0                | 1 (100)         |
| <b>Systemic Therapy Line 3</b>                           | <b>91 (11.3)</b> | <b>10 (4.2)</b> |
| <b>Line 3: Anti-PD-1/PD-L1-based therapies</b>           | <b>34 (37.4)</b> | <b>4 (40.0)</b> |
| Pembrolizumab                                            | 7 (20.6)         | 1 (25.0)        |
| Nivolumab                                                | 5 (14.7)         | 0               |
| Atezolizumab                                             | 3 (8.8)          | 1 (25.0)        |
| Carboplatin, pembrolizumab, pemetrexed                   | 3 (8.8)          | 0               |
| Carboplatin, paclitaxel, pembrolizumab                   | 3 (8.8)          | 0               |
| Docetaxel, pembrolizumab                                 | 1 (2.9)          | 1 (25.0)        |
| Pembrolizumab, pemetrexed                                | 2 (5.9)          | 0               |
| Anastrozole, capecitabine, pembrolizumab                 | 1 (2.9)          | 0               |
| Atezolizumab, bevacizumab-awwb, carboplatin, paclitaxel  | 1 (2.9)          | 0               |
| Bevacizumab-awwb, carboplatin, pembrolizumab, pemetrexed | 1 (2.9)          | 0               |
| Capecitabine, pembrolizumab                              | 1 (2.9)          | 0               |
| Carboplatin, gemcitabine, pembrolizumab                  | 1 (2.9)          | 0               |
| Docetaxel, gemcitabine, nivolumab                        | 1 (2.9)          | 0               |
| Fluorouracil, irinotecan, pembrolizumab                  | 1 (2.9)          | 0               |
| Ipilimumab, nivolumab                                    | 0                | 1 (25.0)        |
| Nivolumab, temozolomide                                  | 1 (2.9)          | 0               |
| Paclitaxel, pembrolizumab                                | 1 (2.9)          | 0               |
| Pembrolizumab, rucaparib                                 | 1 (2.9)          | 0               |
| <b>Line 3: Anti-VEGF-based therapies</b>                 | <b>12 (13.2)</b> | <b>2 (20.0)</b> |
| Docetaxel, ramucirumab                                   | 6 (50.0)         | 1 (50.0)        |
| Bevacizumab-awwb, carboplatin, pemetrexed                | 1 (8.3)          | 0               |
| Bevacizumab-awwb, pemetrexed                             | 1 (8.3)          | 0               |

|                                                         |                  |                 |
|---------------------------------------------------------|------------------|-----------------|
| Bevacizumab                                             | 1 (8.3)          | 0               |
| Bevacizumab, carboplatin, gemcitabine                   | 1 (8.3)          | 0               |
| Bevacizumab, pemetrexed                                 | 0                | 1 (50.0)        |
| Bevacizumab-bvzr, carboplatin, pemetrexed               | 1 (8.3)          | 0               |
| Paclitaxel, ramucirumab                                 | 1 (8.3)          | 0               |
| <b>Line 3: Platinum-based chemotherapy combinations</b> | <b>13 (14.3)</b> | <b>0</b>        |
| Carboplatin, paclitaxel                                 | 6 (46.2)         | 0               |
| Carboplatin, pemetrexed                                 | 4 (30.8)         | 0               |
| Carboplatin, docetaxel                                  | 1 (7.7)          | 0               |
| Carboplatin, gemcitabine                                | 1 (7.7)          | 0               |
| Carboplatin, hydroxyurea, pemetrexed                    | 1 (7.7)          | 0               |
| <b>Line 3: Non-platinum-based chemo combinations</b>    | <b>1 (1.1)</b>   | <b>0</b>        |
| Docetaxel, paclitaxel protein-bound                     | 1 (100)          | 0               |
| <b>Line 3: Single agent chemotherapy</b>                | <b>24 (26.4)</b> | <b>3 (30.0)</b> |
| Docetaxel                                               | 7 (29.2)         | 2 (66.7)        |
| Gemcitabine                                             | 9 (37.5)         | 0               |
| Pemetrexed                                              | 4 (16.7)         | 0               |
| Vinorelbine                                             | 4 (16.7)         | 0               |
| Paclitaxel protein-bound                                | 0                | 1 (33.3)        |
| <b>Line 3: Other therapy</b>                            | <b>7 (7.7)</b>   | <b>1 (10.0)</b> |
| Durvalumab                                              | 2 (28.6)         | 1 (100)         |
| Afatinib                                                | 1 (14.3)         | 0               |
| Alectinib, carboplatin, paclitaxel                      | 1 (14.3)         | 0               |
| Brigatinib                                              | 1 (14.3)         | 0               |
| Erlotinib                                               | 1 (14.3)         | 0               |
| Osimertinib                                             | 1 (14.3)         | 0               |
| <b>Systemic Therapy Line 4</b>                          | <b>24 (3.0)</b>  | <b>4 (1.7)</b>  |
| <b>Line 4: Anti-PD-1/PD-L1-based therapies</b>          | <b>5 (20.8)</b>  | <b>1 (25.0)</b> |
| Gemcitabine, pembrolizumab                              | 1 (20.0)         | 1 (100)         |
| Atezolizumab                                            | 1 (20.0)         | 0               |
| Docetaxel, irinotecan, pembrolizumab                    | 1 (20.0)         | 0               |
| Fluorouracil, leucovorin, pembrolizumab                 | 1 (20.0)         | 0               |
| Ipilimumab, nivolumab                                   | 1 (20.0)         | 0               |
| <b>Line 4: Anti-VEGF-based therapies</b>                | <b>4 (16.7)</b>  | <b>0</b>        |
| Docetaxel, ramucirumab                                  | 2 (50.0)         | 0               |
| Bevacizumab-awwb, carboplatin, paclitaxel protein-bound | 1 (25.0)         | 0               |
| Bevacizumab-bvzr                                        | 1 (25.0)         | 0               |
| <b>Line 4: Platinum-based chemotherapy combinations</b> | <b>5 (20.8)</b>  | <b>0</b>        |
| Carboplatin, etoposide                                  | 1 (20.0)         | 0               |
| Carboplatin, gemcitabine                                | 1 (20.0)         | 0               |
| Carboplatin, gemcitabine, temozolomide                  | 1 (20.0)         | 0               |
| Carboplatin, paclitaxel                                 | 1 (20.0)         | 0               |
| Cisplatin, gemcitabine                                  | 1 (20.0)         | 0               |
| <b>Line 4: Single agent chemotherapy</b>                | <b>8 (33.3)</b>  | <b>1 (25.0)</b> |
| Gemcitabine                                             | 3 (37.5)         | 1 (100)         |
| Vinorelbine                                             | 3 (37.5)         | 0               |
| Docetaxel                                               | 1 (12.5)         | 0               |
| Pemetrexed                                              | 1 (12.5)         | 0               |
| <b>Line 4: Other therapy</b>                            | <b>2 (8.3)</b>   | <b>2 (50.0)</b> |
| Capmatinib                                              | 0                | 1 (50.0)        |

|                                                         |                |                |
|---------------------------------------------------------|----------------|----------------|
| Dabrafenib, trametinib                                  | 0              | 1 (50.0)       |
| Leuprolide                                              | 1 (50.0)       | 0              |
| Regorafenib                                             | 1 (50.0)       | 0              |
| <b>Systemic Therapy Line 5</b>                          | <b>7 (0.9)</b> | <b>1 (0.4)</b> |
| <i>Line 5: Anti-PD-1/PD-L1-based therapies</i>          | 3 (42.9)       | 0              |
| Atezolizumab                                            | 1 (33.3)       | 0              |
| Capecitabine, epirubicin, pembrolizumab                 | 1 (33.3)       | 0              |
| Nivolumab                                               | 1 (33.3)       | 0              |
| <i>Line 5: Anti-VEGF-based therapies</i>                | 1 (14.3)       | 0              |
| Ramucirumab                                             | 1 (100)        | 0              |
| <i>Line 5: Platinum-based chemotherapy combinations</i> | 1 (14.3)       | 0              |
| Carboplatin, paclitaxel                                 | 1 (100)        | 0              |
| <i>Line 5: Single agent chemotherapy</i>                | 1 (14.3)       | 1 (100)        |
| Gemcitabine                                             | 1 (100)        | 0              |
| Docetaxel                                               | 0              | 1 (100)        |
| <i>Line 5: Other therapy</i>                            | 1 (14.3)       | 0              |
| Erlotinib                                               | 1 (100)        | 0              |
| <b>Systemic Therapy Line 6</b>                          | <b>3 (0.4)</b> | <b>1 (0.4)</b> |
| <i>Line 6: Anti-PD-1/PD-L1-based therapies</i>          | 1 (33.3)       | 0              |
| Cisplatin, irinotecan, pembrolizumab                    | 1 (100)        | 0              |
| <i>Line 6: Anti-VEGF-based therapies</i>                | 1 (33.3)       | 0              |
| Bevacizumab-bvzr, paclitaxel protein-bound              | 1 (100)        | 0              |
| <i>Line 6: Single agent chemotherapy</i>                | 0              | 1 (100)        |
| Gemcitabine                                             | 0              | 1 (100)        |
| <i>Line 6: Other therapy</i>                            | 1 (33.3)       | 0              |
| Dabrafenib, trametinib                                  | 1 (100)        | 0              |
| <b>Systemic Therapy Line 7</b>                          | <b>1 (0.1)</b> | <b>0</b>       |
| <i>Line 7: Other therapy</i>                            | 1 (100)        | 0              |
| Dabrafenib, hydroxyurea, trametinib                     | 1 (100)        | 0              |

<sup>1</sup> Drug regimen classes are shown as a percentage of the relevant treatment line, with drug regimens shown as a percentage of the relevant regimen class. Mutually exclusive regimen classes were assigned in hierarchical order as shown, beginning with anti-PD-1/PD-L1-based therapy. Some agents in these next lines of therapy could be for treating NSCLC or another malignancy. Data are *n* (%), and percentages may not total 100 because of rounding. PD1/PD-L1: programmed death 1/programmed death ligand-1; VEGF: vascular endothelial growth factor.



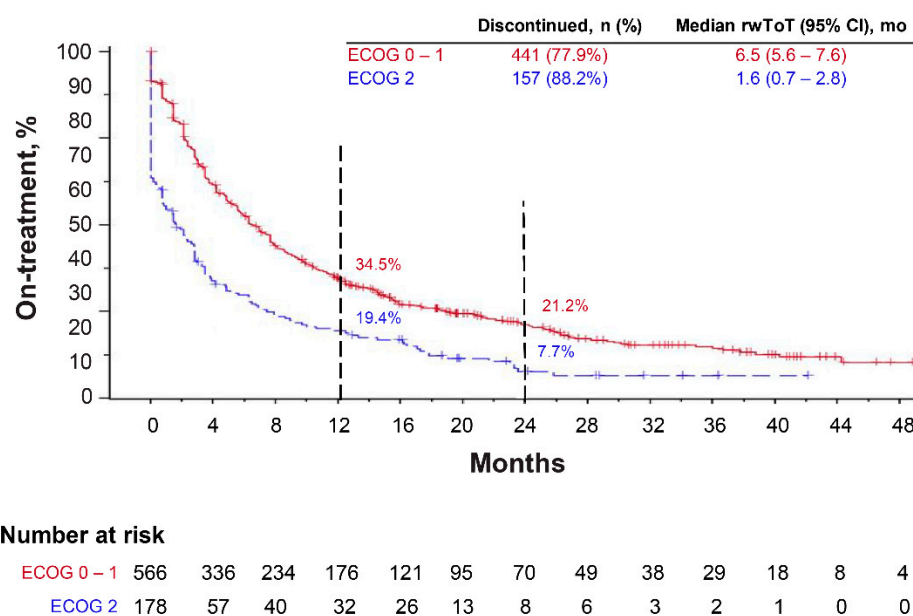

**Figure S1.** Kaplan–Meier plot depicting real-world time on treatment (rwToT) with pembrolizumab for patients with initial NSCLC diagnosis made at stage IV, according to ECOG performance status.
